# Supplementary material for: Sexual rejection via a vomeronasal receptor-triggered limbic circuit
Source: PubMed Central journal article supplement (PMC6203846; doi:10.1038/s41467-018-07003-5), 2018-10-26
Supplement: 41467_2018_7003_MOESM3_ESM.pdf [file 41467_2018_7003_MOESM3_ESM.pdf]

## **Description of Additional Supplementary Files**

**File Name:** Supplementary Movie 1

**Description:** 1 A C57BL/6J adult female mouse displays ESP22-mediated sexual rejections (4.33 MB). Video showing a social interaction between a C57BL/6J adult female mouse and a stud ICR male mouse. An ESP22-stimulated female mouse displays rejecting postures upon mounting.
